# Supplementary material
Source: publisher figshare collection journal article supplement (https://tandf.figshare.com/ndownloader/files/12382454)
Supplement: Supplementary file 1 [file 12382454]

**Appendix**

| **Country** | **Name of categories**  **2007-2016** | **Investigative** | **Non-investigative** | **Total** | **%** |
| --- | --- | --- | --- | --- | --- |
| **USA** | *Public service, *Investigative *Reporting, *Local, * National | 33 | 23 | 56 | **59** |
| **Britain**  (of the year) | Campaign; *Scoop, *Digital journalist, *Young journalist; *Journalist. *Cudlipp award; *Business and finance journalist, Science and health journalist. | 36 | 31 | 67 | **54** |
| **Australia** | *Print news report; Newspaper feature writing; Best digital journalism; *Business journalism; *Investigative journalism; *Sport journalism;* Gold Walkley; Print/text news report; Feature writing long; Feature writing short; Multimedia storytelling; Scoop of the year. | 31 | 26 | 57 | **54** |
| **Totals** |  | **100** | **80** | **180** |  |

*Category names survive over time. Notes: N= 180; story duplicates removed. For comparative purposes, operative definition applied to print stories only.
